# Supplementary material for: Sex differences in functional modulation of microglia by early-life physical stress in a rat model of chronic primary low back pain
Source: Research Square preprint supplement (doi:10.21203/rs.3.rs-7156472/v1), 2025-07-28
Supplement: Supplementary file 1 [file a36fff9261cfb124ecdbdc16.docx]

Table 1: ARRIVE Guidelines: A checklist of 10 essential items for animal studies

| 1. Study design |
| --- |
| 1. Experimental study and parallel group design. (Methods, *section 2*) 2. The experimental unit is each animal. |
| 1. Sample size |
| 1. Total of 16 female and 16 male Wistar rats were used (Details in *section 2.1*.). Sample size and experimental procedure approved by “Regierungspräsidium”, the regional board, Karlsruhe, Germany. 2. The sample size was based on the previous studies with similar design (Singaravelu *et. al.,* 2022). |
| 1. Inclusion and exclusion criteria |
| 1. Four of six best tissue extracted were used for stainings. The tissues with lesions were excluded. 2. N has been mentioned in *section 2.1.* in methods. |
| 1. Randomisation |
| 1. No randomisation was used 2. Identical protocol with identical Iba1+ antibodies were used from the previous study (Singaravelu et al., 2022). 3. Fully automated cell classification was used for all treatments to minimize the investigator’s bias. |
| 1. Blinding/Masking |
| The experimenter (D.S.) was blinded to the assignment of the animals into treatment groups. The unblinding code was held by J.R.H., who did not disclose this information to D.S. |
| 1. Outcome measures |
| 1. 3D acquisition of the Iba-1+ microglia cells in the L2 section of the spinal cord. Automated morphology analysis of the microglia in three states: Surveillant, Primed and Activated. 2. This was not a confirmative study. No primary outcomes were defined. |
| 1. Statistical methods |
| Pre-processing of data: Cluster analysis  Data analysis: Two-way ANOVA, independent t-test. Cohen’s d. (*Methods section 2.7*) |
| 1. Experimental animals |
| 1. Adolescent male and female rats (Wistar Han outbred), initial body weight 50g.Terminal body weight 200-225g (females) and 385-415g (males). 2. The animals were also monitored for grooming behaviour and abnormal posture. |
| 1. Experimental procedures |
| Experimental procedure: stress paradigm described in *section 2.2*, nerve growth factor or saline injections in *section 2.3*, Treatment groups in *section 2.4*, Perfusion and tissue preparation in *section 2.5*. The timeline is highlighted in Fig 1. The rationale has been mentioned in Introduction (section 1). |
| 1. Results |
| Data are given as means ± SE of the proportion of the microglia in each state. The details are mentioned in Results (section 3). |

Table 2: Cluster Characteristics

| Features | Surveillant | §d | Primed | ^d | Activated |
| --- | --- | --- | --- | --- | --- |
| No. of Cells | 1548 |  | 1642 |  | 277 |
|  |  |  |  |  |  |
| Cell Territorial Vol (1000μm3) | 121.5±79.6 | **1.54** | 32.5±22.4 | 0.94 | 12.5±9.9 |
| Cell Volume (1000μm3) | 17.6±10.7 | **1.33** | 7.1±3.8 | 0.62 | 4.6±2.9 |
| Ramification index | 7.4±3.2 | 0.97 | 4.7±2.1 | 1.03 | 2.6±1.1 |
|  |  |  |  |  |  |
| Number of branch points | 16.1±13.1 | 1.15 | 5.2±2.8 | 1.97 | 0.0±0.0 |
|  |  |  |  |  |  |
| Average Branch length (μm) | 104.1±38.8 | 1.37 | 59.7±24.5 | **2.63** | 0.0±0.0 |
| Max Branch length (μm) | 222.5±130.9 | 1.23 | 103.7±43.7 | **2.56** | 0.0±0.0 |
| Min Branch length (μm) | 21.4±11.9 | 0.17 | 23.9±16.9 | 1.53 | 0.0±0.0 |

*The table represents the different characteristics based on which the clusters were classified. The number of cells represents each cluster's total number of cells. The columns, as mentioned, represent the median of the features in each cluster (Surveillant, Primed and Activated), used to assign the cell morphology type to each cluster. The ramification index is the ratio between the cell territorial and cell volumes. § represents Cohen's d of the features difference while transitioning from surveillant to primed state of microglia. ^ represents Cohen's d on the state of the features difference while transitioning from primed to activated state of microglia.*

Table 3: Sex differences in microglia states

| Microglia State | Groups | p |  | d |  |
| --- | --- | --- | --- | --- | --- |
| Surveillant | Overall | 0.0000 | *** | 1.92 | ### |
| Primed | Overall | 0.0000 | *** | 1.62 | ### |
| Activated | Overall | 0.0014 | ** | 1.96 | ### |
|  |  |  |  |  |  |
| Surveillant | Superficial DH | 0.0297 | * | 1.98 | ### |
| Primed | Superficial DH | 0.0542 |  | 1.45 | ### |
| Activated | Superficial DH | 0.1140 |  | 2.14 | ### |
|  |  |  |  |  |  |
| Surveillant | Deep DH | 0.0038 | ** | 1.80 | ### |
| Primed | Deep DH | 0.0101 | * | 1.59 | ### |
| Activated | Deep DH | 0.0314 | * | 1.56 | ### |

*The table represents statistical sex differences in the microglia states. The Overall group represents the sex differences in the distribution of the microglia states pooled across treatment groups. The Superficial DH represents sex differences in the distribution of the microglia states in the superficial dorsal horn region of the spinal cord pooled across treatment groups. The Deep DH represents the sex differences in the distribution of the microglia states in the deep dorsal horn region of the spinal cord pooled across treatment groups. The p-value (p) is calculated using the independent t-test (n = 16). The significance is denoted by : * p<0.05, ** p<0.01, *** p<0.001. Cohen's d (d) is calculated by differences in the mean values divided by pooled SD. The magnitude of the effect sizes were determined by ###d>0.8 refers to a large effect, ##0.8<d>0.5 refers to a medium effect, #0.5>d>0.02 small effect.*

Table 4: Differences between microglia states within sexes and in between the injection groups

| **Microglia State** | **Groups** | **p**  **(Females)** | **d**  **(Females)** | **p**  **(Males)** | **d**  **(Males)** | **p**  **(Overall)** | **d**  **(Overall)** |
| --- | --- | --- | --- | --- | --- | --- | --- |
| Surveillant | SSN vs CSN | 0.5700 | 0.21 | 0.1409 | 0.97 ### | 0.1410 | 0.37 # |
| Primed | SSN vs CSN | 0.2460 | 0.42 # | 0.5414 | 0.64 ## | 0.5410 | 0.15 |
| Activated | SSN vs CSN | 0.2360 | 0.43 # | 0.0145 * | 0.82 ### | 0.0146 * | 0.63 ## |
|  | | | | | | | |
| Surveillant | CNN vs CSN | 0.0084 ** | 0.99 ### | 0.0009 *** | 1.32 | 0.5190 | 0.16 |
| Primed | CNN vs CSN | 0.0037 ** | 1.13 ### | 0.0017 ** | 1.23 | 0.6491 | 0.14 |
| Activated | CNN vs CSN | 0.6060 | 0.18 | 0.1440 | 0.53 | 0.4030 | 0.21 |
|  | | | | | | | |
| Surveillant | SSN vs SSS | 0.8800 | 0.05 | 0.0840 | 0.64 | 0.1810 | 0.34 # |
| Primed | SSN vs SSS | 0.9220 | 0.03 | 0.0904 | 0.62 | 0.1690 | 0.35 # |
| Activated | SSN vs SSS | 0.8340 | 0.07 | 0.6540 | 0.16 | 0.6290 | 0.12 |

*The table represents the statistical differences in the microglia states across the treatment groups in females. SSN vs CSN compares the differences between the priming by stress and the control group. CNN vs CSN compares the priming by NGF and the control group. SSN vs SSS compares the priming by stress with single and no NGF injection. The p-value is calculated using the independent t-test. p (Females) is the p-value in females, and d (Females) is the Cohen’s d in females. p (Males) is the p-value in males and d (Males) is the Cohen’s d in males. p(Overall) is p-value combined across both sexes and d(Overall) is Cohen’s d combined over both sexes. The significance is denoted by : * p<0.05, ** p<0.01, *** p<0.001. Cohen's d is calculated by differences in the mean values divided by pooled SD. The magnitude of the effect sizes were determined by ###d>0.8 refers to a large effect, ##0.8<d>0.5 refers to a medium effect, #0.5>d>0.02 small effect. SSN: Stress+Saline+NGF; SSS: Stress+Saline+Saline; CSN: Control+Saline+NGF; CNN: Control+NGF+NGF. For each group tested, n=4.*
